# Supplementary material for: Integrative multi-omic sequencing reveals the MMTV-Myc mouse model mimics human breast cancer heterogeneity
Source: Springer Nature journal article supplement (doi:10.1186/s13058-023-01723-3), 2023-10-07

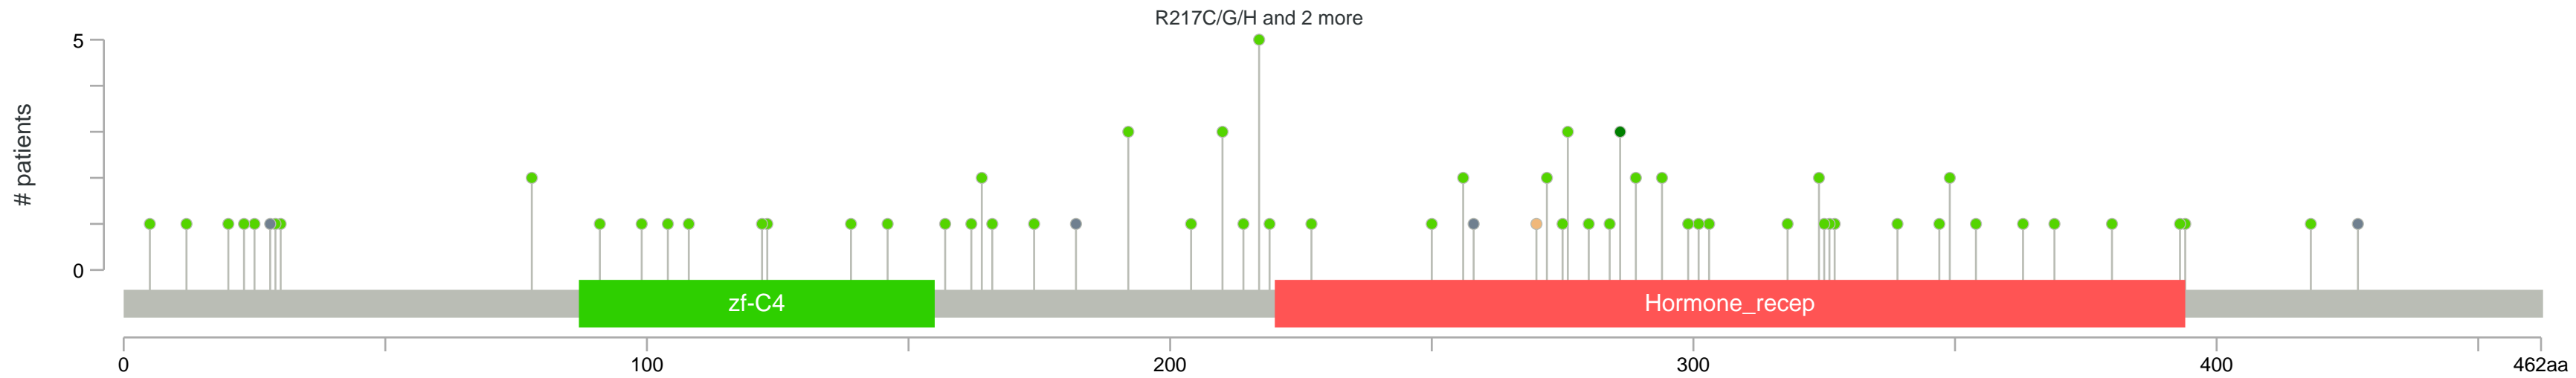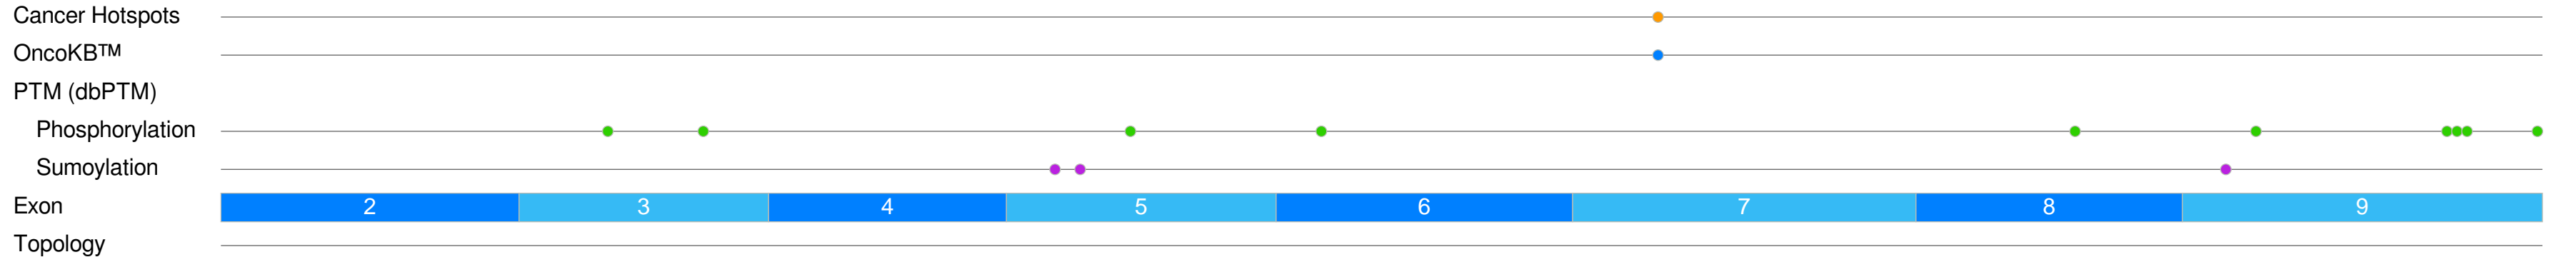

Supplement: MOESM9 [file 26139236]
